# Supplementary material
Source: PubMed Central journal article supplement (PMC3506121)
Supplement: NIHMS405230-supplement-supplement_1.pdf [file NIHMS405230-supplement-supplement_1.pdf]

**Table S1. Associations between childhood hardship and small-for-gestational-age<sup>a</sup> (n=4565)**

|                               | unadjusted |              | + age, body mass index,<br>interbirth interval, smoking,<br>social class, education, marital<br>status |              |             |
|-------------------------------|------------|--------------|--------------------------------------------------------------------------------------------------------|--------------|-------------|
|                               | OR         | 95% CI       | OR                                                                                                     | 95% CI       | p for trend |
| Financial/structural hardship |            |              |                                                                                                        |              |             |
| 0                             |            |              |                                                                                                        |              | 0.1         |
| 1                             | 1.21       | (1.05, 1.40) | 1.03                                                                                                   | (0.89, 1.20) |             |

|                               |    |      |              |       |      |              |      |
|-------------------------------|----|------|--------------|-------|------|--------------|------|
|                               | 2+ | 1.59 | (1.33, 1.92) |       | 1.20 | (0.99, 1.45) |      |
| No interest in education      |    |      |              |       |      |              |      |
|                               | 0  |      |              | <0.01 |      |              | 0.10 |
|                               | 1  | 1.46 | (1.25, 1.70) |       | 1.25 | (1.06, 1.47) |      |
|                               | 2+ | 1.53 | (1.33, 1.75) |       | 1.13 | (0.96, 1.33) |      |
| Family dysfunction            |    |      |              |       |      |              |      |
|                               | 0  |      |              | <0.01 |      |              | 0.03 |
|                               | 1+ | 1.34 | (1.14, 1.57) |       | 1.20 | (1.02, 1.42) |      |
| Lack of supportive caregiving |    |      |              |       |      |              |      |
|                               | 0  |      |              | 0.03  |      |              | 0.53 |
|                               | 1+ | 1.15 | (1.01, 1.30) |       | 1.04 | (0.92, 1.19) |      |

Violence/mental health issues

|    |      |              |  |       |      |              |      |
|----|------|--------------|--|-------|------|--------------|------|
| 0  |      |              |  | <0.01 |      |              | 0.24 |
| 1  | 1.23 | (1.08, 1.41) |  |       | 1.05 | (0.91, 1.21) |      |
| 2+ | 1.52 | (1.28, 1.81) |  |       | 1.12 | (0.93, 1.34) |      |

Issues of family structure\*

|    |      |              |  |       |      |              |      |
|----|------|--------------|--|-------|------|--------------|------|
| 0  |      |              |  | <0.01 |      |              | 0.08 |
| 1+ | 1.33 | (1.16, 1.52) |  |       | 1.14 | (0.98, 1.32) |      |

Overall

|    |      |              |  |       |      |              |      |
|----|------|--------------|--|-------|------|--------------|------|
| 0  |      |              |  | <0.01 |      |              | 0.02 |
| 1  | 1.15 | (0.93, 1.41) |  |       | 1.10 | (0.89, 1.36) |      |
| 2  | 1.41 | (1.15, 1.74) |  |       | 1.28 | (1.04, 1.58) |      |
| 3  | 1.40 | (1.12, 1.75) |  |       | 1.16 | (0.92, 1.46) |      |
| 4+ | 1.76 | (1.48, 2.10) |  |       | 1.26 | (1.04, 1.53) |      |

---

---

<sup>a</sup> Small for gestational age defined as birthweight <10<sup>th</sup> percentile for gestational age based on published norms

Wilcox M, Gardosi J, Mongelli, M, Ray C, Johnson I. Birth weight from pregnancies dated by ultrasonography in a multicultural British population. *BMJ* 1993;307(6904): 588-591.

**Table S2. Associations between individual childhood hardships, low birthweight, and preterm birth (n=4865)**

|                               | LBW        |              |                                                                                               |              | PTB        |              |                                                                                               |              |
|-------------------------------|------------|--------------|-----------------------------------------------------------------------------------------------|--------------|------------|--------------|-----------------------------------------------------------------------------------------------|--------------|
|                               | unadjusted |              | + age, body mass index, interbirth interval, smoking, social class, education, marital status |              | unadjusted |              | + age, body mass index, interbirth interval, smoking, social class, education, marital status |              |
|                               | OR         | 95% CI       | OR                                                                                            | 95% CI       | OR         | 95% CI       | OR                                                                                            | 95% CI       |
| Financial/structural hardship |            |              |                                                                                               |              |            |              |                                                                                               |              |
| unemployment                  | 1.19       | (0.84, 1.70) | 0.97                                                                                          | (0.65, 1.46) | 1.17       | (0.84, 1.64) | 1.12                                                                                          | (0.76, 1.65) |

|                                  |      |        |      |        |      |        |      |        |
|----------------------------------|------|--------|------|--------|------|--------|------|--------|
|                                  |      | (0.94, |      | (0.73, |      | (0.87, |      | (0.77, |
| eligible for free school lunches | 1.18 | 1.47)  | 0.95 | 1.24)  | 1.08 | 1.34)  | 0.99 | 1.28)  |
|                                  |      | (0.98, |      | (0.86, |      | (0.84, |      | (0.78, |
| share bed                        | 1.23 | 1.53)  | 1.11 | 1.45)  | 1.05 | 1.30)  | 1.00 | 1.28)  |
| contact with criminal justice    |      | (1.17, |      | (0.94, |      | (0.89, |      | (0.80, |
| system                           | 1.51 | 1.93)  | 1.28 | 1.75)  | 1.15 | 1.49)  | 1.08 | 1.47)  |
| No interest in education         |      |        |      |        |      |        |      |        |
|                                  |      | (1.22, |      | (0.93, |      | (1.07, |      | (0.95, |
| mother's lack of interest        | 1.46 | 1.74)  | 1.17 | 1.47)  | 1.27 | 1.51)  | 1.19 | 1.47)  |
|                                  |      | (1.09, |      | (0.84, |      | (0.96, |      | (0.84, |
| father's lack of interest        | 1.29 | 1.54)  | 1.04 | 1.30)  | 1.14 | 1.35)  | 1.03 | 1.27)  |
| parents hope child will leave    |      | (1.14, |      | (0.92, |      | (1.04, |      | (0.93, |
| school at minimum age            | 1.37 | 1.64)  | 1.15 | 1.45)  | 1.23 | 1.46)  | 1.15 | 1.42)  |

Family dysfunction

|                              |      |        |      |        |      |        |      |        |
|------------------------------|------|--------|------|--------|------|--------|------|--------|
|                              |      | (0.98, |      | (0.77, |      | (1.06, |      | (0.91, |
| family problems with tension | 1.43 | 2.08)  | 1.21 | 1.90)  | 1.51 | 2.14)  | 1.38 | 2.09)  |
|                              |      | (1.00, |      | (0.66, |      | (1.47, |      | (0.87, |
| alcoholism                   | 2.01 | 4.04)  | 1.34 | 3.37)  | 2.67 | 4.86)  | 2.15 | 5.31)  |
|                              |      | (0.43, |      | (0.38, |      | (0.27, |      | (0.23, |
| other family difficulties    | 0.82 | 1.56)  | 0.73 | 1.37)  | 0.56 | 1.14)  | 0.52 | 1.17)  |
|                              |      | (0.74, |      | (0.60, |      | (0.89, |      | (0.81, |
| doesn't get on with mother   | 1.11 | 1.66)  | 0.98 | 1.60)  | 1.27 | 1.82)  | 1.20 | 1.79)  |
|                              |      | (1.09, |      | (0.97, |      | (1.13, |      | (1.01, |
| doesn't get on with father   | 1.48 | 2.02)  | 1.38 | 1.96)  | 1.51 | 2.02)  | 1.44 | 2.05)  |

Lack of supportive caregiving

|                              |      |        |      |        |      |        |      |        |
|------------------------------|------|--------|------|--------|------|--------|------|--------|
|                              |      | (0.90, |      | (0.84, |      | (0.66, |      | (0.65, |
| father doesn't read to child | 1.11 | 1.36)  | 1.06 | 1.33)  | 0.81 | 0.99)  | 0.81 | 1.02)  |

|                                     |      |        |      |        |      |        |      |        |
|-------------------------------------|------|--------|------|--------|------|--------|------|--------|
|                                     |      | (0.88, |      | (0.83, |      | (0.79, |      | (0.77, |
| mother doesn't read to child        | 1.13 | 1.45)  | 1.09 | 1.43)  | 1.01 | 1.28)  | 1.01 | 1.34)  |
|                                     |      | (1.02, |      | (0.88, |      | (0.90, |      | (0.85, |
| father does not take an active role | 1.27 | 1.58)  | 1.14 | 1.48)  | 1.11 | 1.38)  | 1.07 | 1.36)  |
| Violence/mental health issues       |      |        |      |        |      |        |      |        |
|                                     |      | (1.17, |      | (0.85, |      | (0.71, |      | (0.63, |
| physically neglected                | 1.61 | 2.22)  | 1.26 | 1.87)  | 1.02 | 1.46)  | 0.95 | 1.45)  |
|                                     |      | (1.27, |      | (0.98, |      | (0.94, |      | (0.80, |
| socially maladjusted                | 1.57 | 1.94)  | 1.28 | 1.66)  | 1.17 | 1.45)  | 1.05 | 1.37)  |
|                                     |      | (0.96, |      | (0.72, |      | (0.63, |      | (0.49, |
| mental subnormality in family       | 1.81 | 3.38)  | 1.04 | 3.08)  | 1.24 | 2.47)  | 1.10 | 2.46)  |
|                                     |      | (1.08, |      | (0.98, |      | (0.93, |      | (0.89, |
| experienced bullying                | 1.45 | 1.95)  | 1.35 | 1.87)  | 1.25 | 1.68)  | 1.21 | 1.66)  |
| in contact with social services     | 1.55 | (1.31, | 1.30 | (1.07, | 1.3  | (1.10, | 1.22 | (1.01, |



|                            |      |        |      |        |      |        |      |        |
|----------------------------|------|--------|------|--------|------|--------|------|--------|
|                            |      | 1.84)  |      | 1.60)  |      | 1.53)  |      | 1.47)  |
| Issues of family structure |      |        |      |        |      |        |      |        |
|                            |      | (0.97, |      | (0.70, |      | (1.06, |      | (0.88, |
| spent time in foster care  | 1.36 | 1.91)  | 1.06 | 1.62)  | 1.45 | 1.99)  | 1.29 | 1.88)  |
|                            |      | (0.61, |      | (0.47, |      | (0.67, |      | (0.62, |
| single mother              | 0.97 | 1.55)  | 0.81 | 1.40)  | 1.03 | 1.58)  | 0.99 | 1.59)  |
|                            |      | (0.79, |      | (0.64, |      | (0.93, |      | (0.85, |
| parents divorced           | 1.01 | 1.31)  | 0.88 | 1.21)  | 1.17 | 1.47)  | 1.11 | 1.45)  |
|                            |      | (0.98, |      | (0.92, |      | (1.13, |      | (1.09, |
| parent is dead             | 1.31 | 1.75)  | 1.27 | 1.74)  | 1.47 | 1.92)  | 1.46 | 1.96)  |

---
